# Supplementary material for: GUS Reporter-Aided Promoter Deletion Analysis of A. thaliana POLYAMINE OXIDASE 3
Source: MDPI journal article supplement (doi:10.3390/ijms24032317), 2023-01-24
Supplement: s1 [file s1]

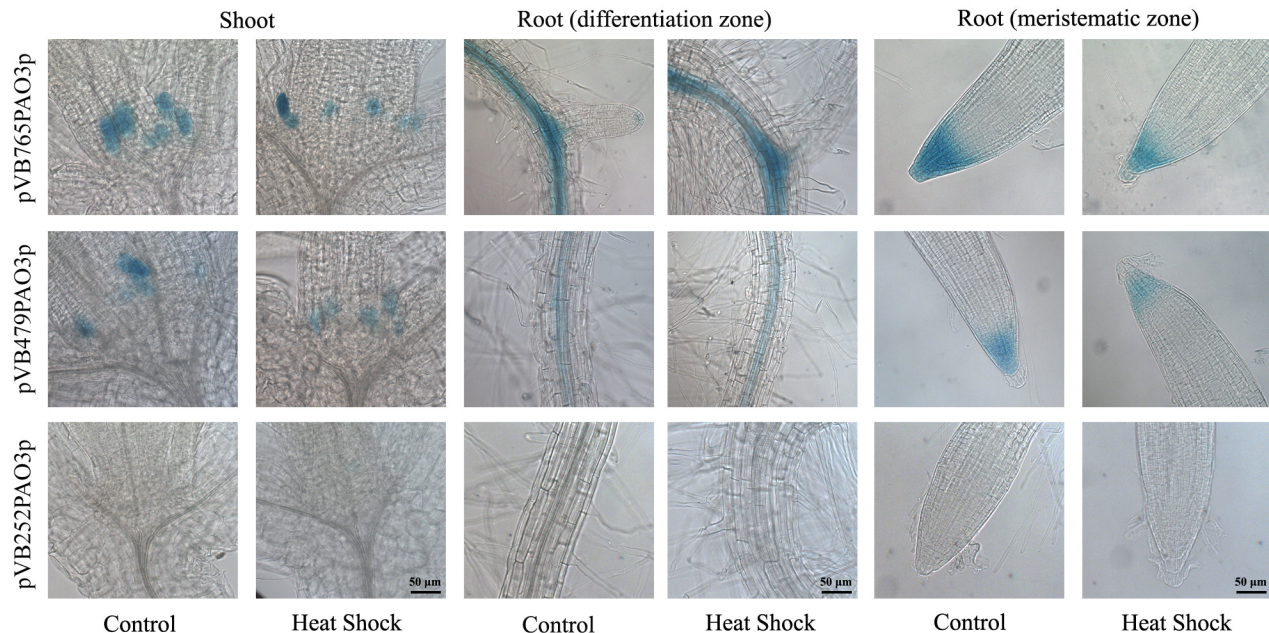

**Figure S1.** GUS-mediated *PAO3* expression pattern during heat stress. Representative images of histochemical GUS-stained transgenic plants harboring the constructs pVB765PAO3p, pVB479PAO3p and pVB252PAO3p. Shoot and root tissues (differentiation and meristematic zones) of control and heat treated 8-day-old seedlings showed similar expression levels, while root tips displayed a slight decrease in GUS staining.

**Supplementary Table S1:** Primers used in this study.

| Primer name     | Sequence                       |
|-----------------|--------------------------------|
| AtPAO3pdaF1-Sal | ATAGTCGACGGCATATAGTTTTCTCCGA   |
| AtPAO3pdaF2-Sal | ATAGTCGACAGGATAGACTAGGCCTGCAT  |
| AtPAO3pdaF3-Sal | ATAGTCGACGTACGTAACGACTAGCGAGT  |
| AtPAO3pdaF4-Sal | ATAGTCGACGTAGGTTTCCGATTAAAGCGA |
| AtPAO3pdaF5-Sal | ATAGTCGACTTCGTTGATCTCTGTGGAAG  |
| AtPAO3pdaR1-Bam | ATAGGATCCGATTCAACAATGAACGGAGT  |

**Table S2:** Putative TFBs identified within the regulatory sequence of the *AtPAO3* gene locus

| Category                                 | Motif                                                  | Consensus Sequence      | Function                                                                                                                                                                                                                                             | Position                                 |
|------------------------------------------|--------------------------------------------------------|-------------------------|------------------------------------------------------------------------------------------------------------------------------------------------------------------------------------------------------------------------------------------------------|------------------------------------------|
| ABA, Dehydration and Salinity responsive | MYBCORE                                                | CNGTTR                  | Binding site for ATMYB1 and ATMYB2. ATMYB2 is involved in regulation of genes that are responsive to water stress in Arabidopsis.                                                                                                                    | -973, -863                               |
|                                          | MYCCONSENSUSAT                                         | CANNTG                  | MYC recognition site found in the promoters of the dehydration-responsive gene rd22 and many other genes in Arabidopsis. Binding site of ATMYC2 (previously known as rd22BP1)                                                                        | -973, -919, -863, -842, -816, -743, -526 |
|                                          | MYCATERD1                                              | CATGTG                  | MYC recognition sequence necessary for expression of erd1 (early responsive to dehydration) in dehydrated Arabidopsis.                                                                                                                               | -816                                     |
|                                          | MYB2CONSENSUSAT                                        | YAACKG                  | MYB recognition site found in the promoters of the dehydration-responsive gene rd22 and many other genes in Arabidopsis.                                                                                                                             | -566                                     |
|                                          | GT1GMSCAM4                                             | GAAAAA                  | "GT-1 motif" found in the promoter of soybean (Glycine max) CaM isoform, SCaM-4; Plays a role in pathogen- and salt-induced SCaM-4 gene expression.                                                                                                  | -776, -449, -344                         |
|                                          | WRKY71OS (WRKY TF interacts with ABAR which binds ABA) | TGAC                    | "A core of TGAC-containing W-box" of, e.g., Amy32b promoter; Binding site of rice WRKY71, a transcriptional repressor of the gibberellin signaling pathway. WRKYs are positive and negative regulators of abscisic acid signaling in aleurone cells. | -740, -529                               |
|                                          | DPBFCOREDCDC3                                          | ACACNNG                 | A novel class of bZIP transcription factors, DPBF-1 and 2 (Dc3 promoter-binding factor-1 and 2) binding core sequence; Found in the carrot (D.c.) Dc3 gene promoter; Dc3 expression is normally embryo-specific, and can be induced by ABA.          | -527                                     |
|                                          | ABRE                                                   | ACGTG                   | ABA responsive elements                                                                                                                                                                                                                              | -643, -523                               |
|                                          | DRE                                                    | A/GCCGAC/G or TACCGACAT | Dehydration responsive elements                                                                                                                                                                                                                      | -549, -331                               |

|                                     |                  |         |                                                                                                                                                                                                                               |                                    |
|-------------------------------------|------------------|---------|-------------------------------------------------------------------------------------------------------------------------------------------------------------------------------------------------------------------------------|------------------------------------|
| Cell type/organ specific expression | GTGANTG10        | GTGA    | "GTGA motif" found in the promoter of the tobacco late pollen gene g10.                                                                                                                                                       | -969, -563, -530, -415             |
|                                     | TAAAGSTKST1      | TAAAG   | Target site for trans-acting StDof1 protein controlling guard cell-specific gene expression.                                                                                                                                  | -828, -533, -462                   |
|                                     | ROOTMOTIFTAPOX1  | ATATT   | Root specific expression                                                                                                                                                                                                      | -800, -692                         |
|                                     | SITEIIATCYTC     | TGGGCY  | "Site II element" found in the promoter regions of cytochrome genes (CytC-1, CytC-2) in Arabidopsis; Involvement of TCP-domain RT protein-binding elements in anther- and meristem-specific RT expression of the CytC-1 gene. | -729                               |
|                                     | POLLEN1LELAT52   | AGAAA   | Pollen specific expression.                                                                                                                                                                                                   | -778, -451, -346, -229, -216, -194 |
| Phytohormone responsive             | GT1CONSENSUS     | GRWAAW  | Consensus GT-1 binding site. Binding of GT-1-like factors to the PR-1a promoter influences the level of SA-inducible gene expression.                                                                                         | -776, -654, -449, -344             |
|                                     | WBOXATNPR1       | TTGAC   | "W-box" found in promoter of Arabidopsis thaliana (A.t.) NPR1 gene. They were recognized specifically by salicylic acid (SA)-induced WRKY DNA binding proteins.                                                               | -741                               |
|                                     | T/GBOXATPIN2     | AACGTG  | "T/G-box" involves in jasmonate (JA) induction; bHLH-Leu zipper JAMYC2 and JAMYC10 proteins specifically recognize this motif.                                                                                                | -644                               |
| Conserved promoter motifs           | CAATBOX1         | CCAAT   | CAAT-box                                                                                                                                                                                                                      | -397                               |
|                                     | TATABOX3         | TATTAAT | TATA-box                                                                                                                                                                                                                      | -351                               |
| Others                              | LTRE1HVBLT49     | CCGAAA  | "LTRE-1" (low-temperature-responsive element) in barley.                                                                                                                                                                      | -991                               |
|                                     | ANAERO1CONSENSUS | AAACAAA | One of 16 motifs found in silico in promoters of 13 anaerobic genes involved in the fermentative pathway                                                                                                                      | -772, -364                         |



|                 |           |                                                                                                                                                                                                                                                                                                                                                                                                                                                       |                                          |
|-----------------|-----------|-------------------------------------------------------------------------------------------------------------------------------------------------------------------------------------------------------------------------------------------------------------------------------------------------------------------------------------------------------------------------------------------------------------------------------------------------------|------------------------------------------|
| ACGTATERD1      | ACGT      | ACGT sequence required for etiolation-induced expression of <i>erd1</i> (early responsive to dehydration) in <i>Arabidopsis</i> .                                                                                                                                                                                                                                                                                                                     | -672,<br>-643,<br>-619,<br>-527,<br>-426 |
| ABRERATCAL      | MACGYGB   | "ABRE-related sequence" or "Repeated sequence motifs" identified in the upstream regions of 162 $\text{Ca}^{(2+)}$ -responsive upregulated genes.                                                                                                                                                                                                                                                                                                     | -644,<br>-525                            |
| ABRELATERD1     | ACGTG     | ABRE-like sequence required for etiolation-induced expression of <i>erd1</i> (early responsive to dehydration) in <i>Arabidopsis</i> .                                                                                                                                                                                                                                                                                                                | -643,<br>-526                            |
| CURECORECR      | GTAC      | GTAC is the core of a CuRE (copper-response element) found in <i>Cyc6</i> and <i>Cpx1</i> genes in <i>Chlamydomonas</i>                                                                                                                                                                                                                                                                                                                               | -621                                     |
| GADOWNAT        | ACGTGTC   | Sequence present in 24 genes in the GA-down regulated d1 cluster (106 genes) found in <i>Arabidopsis</i> seed germination; This motif is similar to ABRE. Common sequence found in the 5'-non-coding regions of eukaryotic genes; "CCAAT box" found in the promoter of heat shock protein genes; Located immediately upstream from the most distal HSE of the promoter; "CCAAT box" act cooperatively with HSEs to increase the hs promoter activity. | -522                                     |
| CCAATBOX1       | CCAAT     | "CCAAT box" found in the promoter of heat shock protein genes; Located immediately upstream from the most distal HSE of the promoter; "CCAAT box" act cooperatively with HSEs to increase the hs promoter activity.                                                                                                                                                                                                                                   | -397                                     |
| AACACOREOSGLUB1 | AACAAAC   | Core of AACA motifs found in rice (O.s.) glutelin genes, involved in controlling the endosperm-specific expression.                                                                                                                                                                                                                                                                                                                                   | -363                                     |
| CANBNNAPA       | CNAACAC   | Core of "(CA) <sub>n</sub> element" in storage protein genes in <i>Brasica napus</i> (B.n.); embryo- and endosperm-specific transcription of napin (storage protein) gene, <i>napA</i> ; seed specificity; activator and repressor.                                                                                                                                                                                                                   | -361                                     |
| SURE1STPAT21    | AATAGAAAA | Sucrose Responsive Element (SURE); A motif conserved among genes regulated by sucrose.                                                                                                                                                                                                                                                                                                                                                                | -345                                     |
| LTRECOREATCOR15 | CCGAC     | Core of low temperature responsive element (LTRE) of <i>cor15a</i> gene in <i>Arabidopsis</i> (A.t.); A portion of repeat-C (C-repeat), TGGCCGAC, which is repeated twice in <i>cor15a</i> promoter (Baker et al., 1994); ABA responsiveness.                                                                                                                                                                                                         | -331                                     |

---
